# Supplementary material for: Raman Activities of Cyano-Ester Quinoidal Oligothiophenes Reveal Their Diradical Character and the Proximity of the Low-Lying Double Exciton State
Source: MDPI journal article supplement (doi:10.3390/chemistry4020025), 2022-04-15
Supplement: s1 [file s1]

Archive with 1 entries (1 files):
- chemistry-1679218-supplementary.pdf
