# Supplementary material for: Raman Activities of Cyano-Ester Quinoidal Oligothiophenes Reveal Their Diradical Character and the Proximity of the Low-Lying Double Exciton State
Source: MDPI journal article supplement (doi:10.3390/chemistry4020025), 2022-04-15
Supplement: s1 [file s1 › chemistry-1679218-supplementary.pdf]

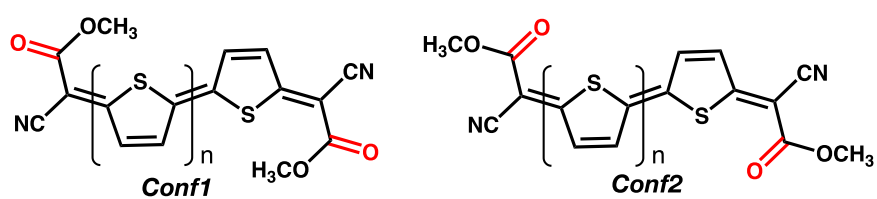

**Figure S1.** the two conformers of cyano-ester oligothiophenes considered in this work.

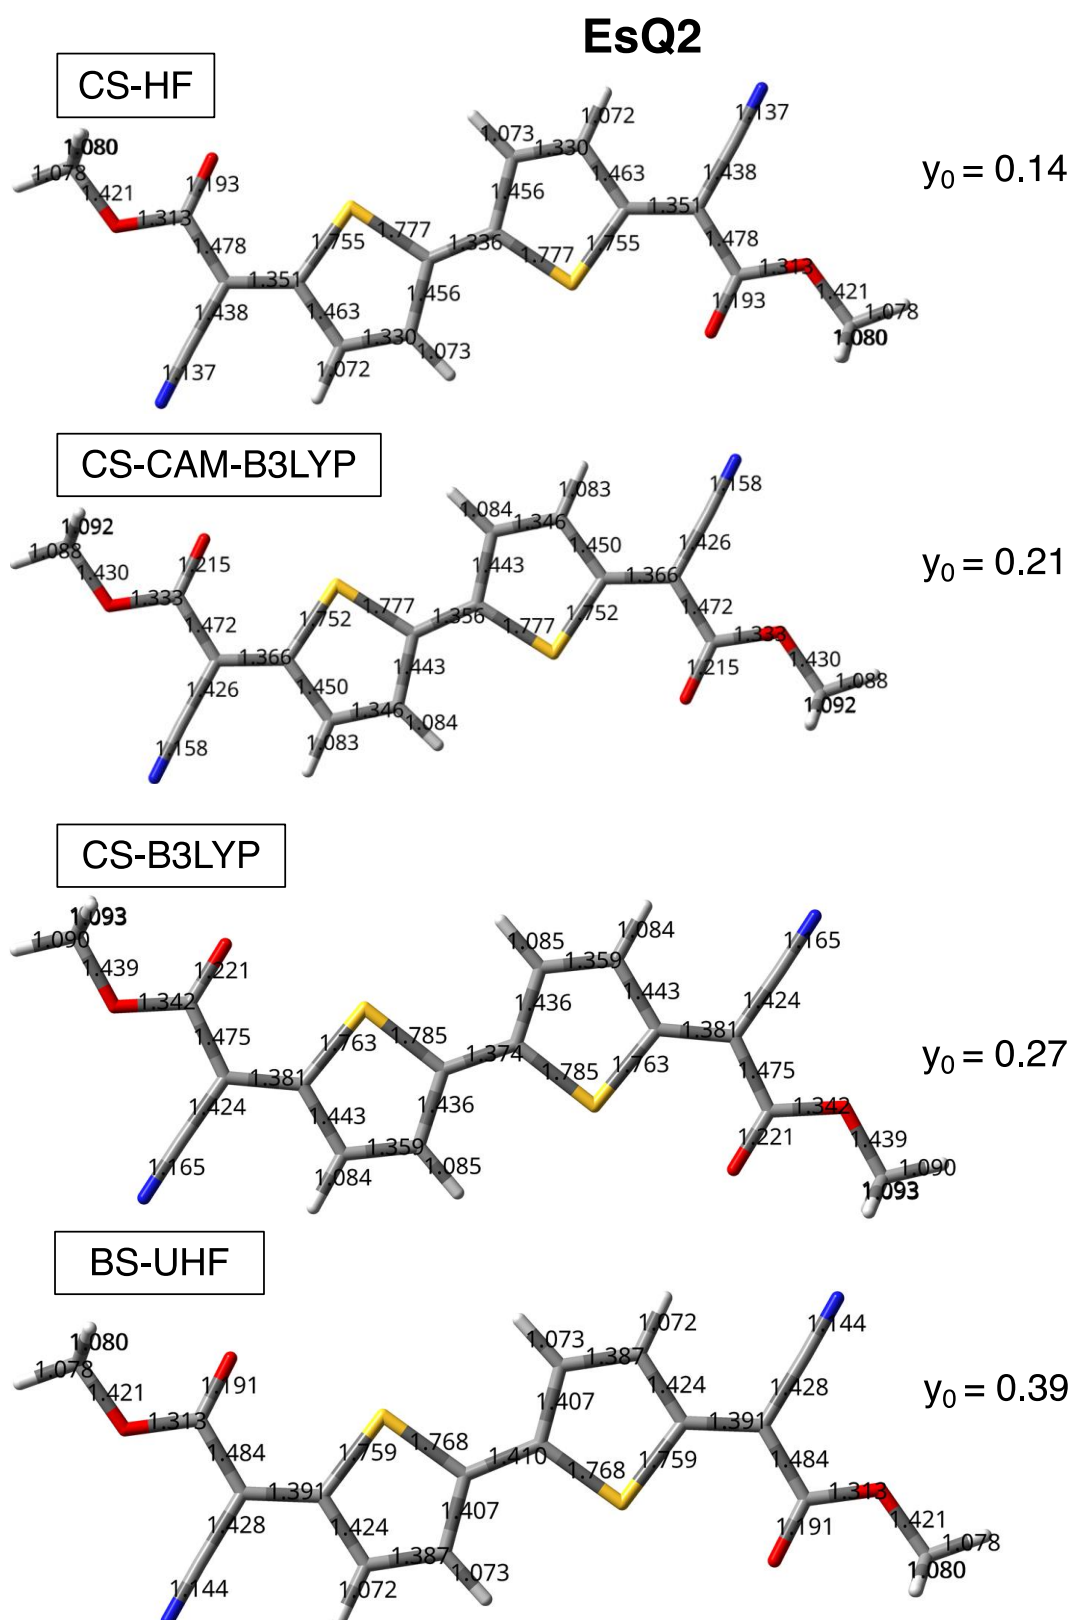

**Figure S2.** Library of ground state geometries generated for **EsQ2** and the corresponding  $y_0^{PUHF}$  value. The level of theory is indicated. The basis set is always 6-31G\*.

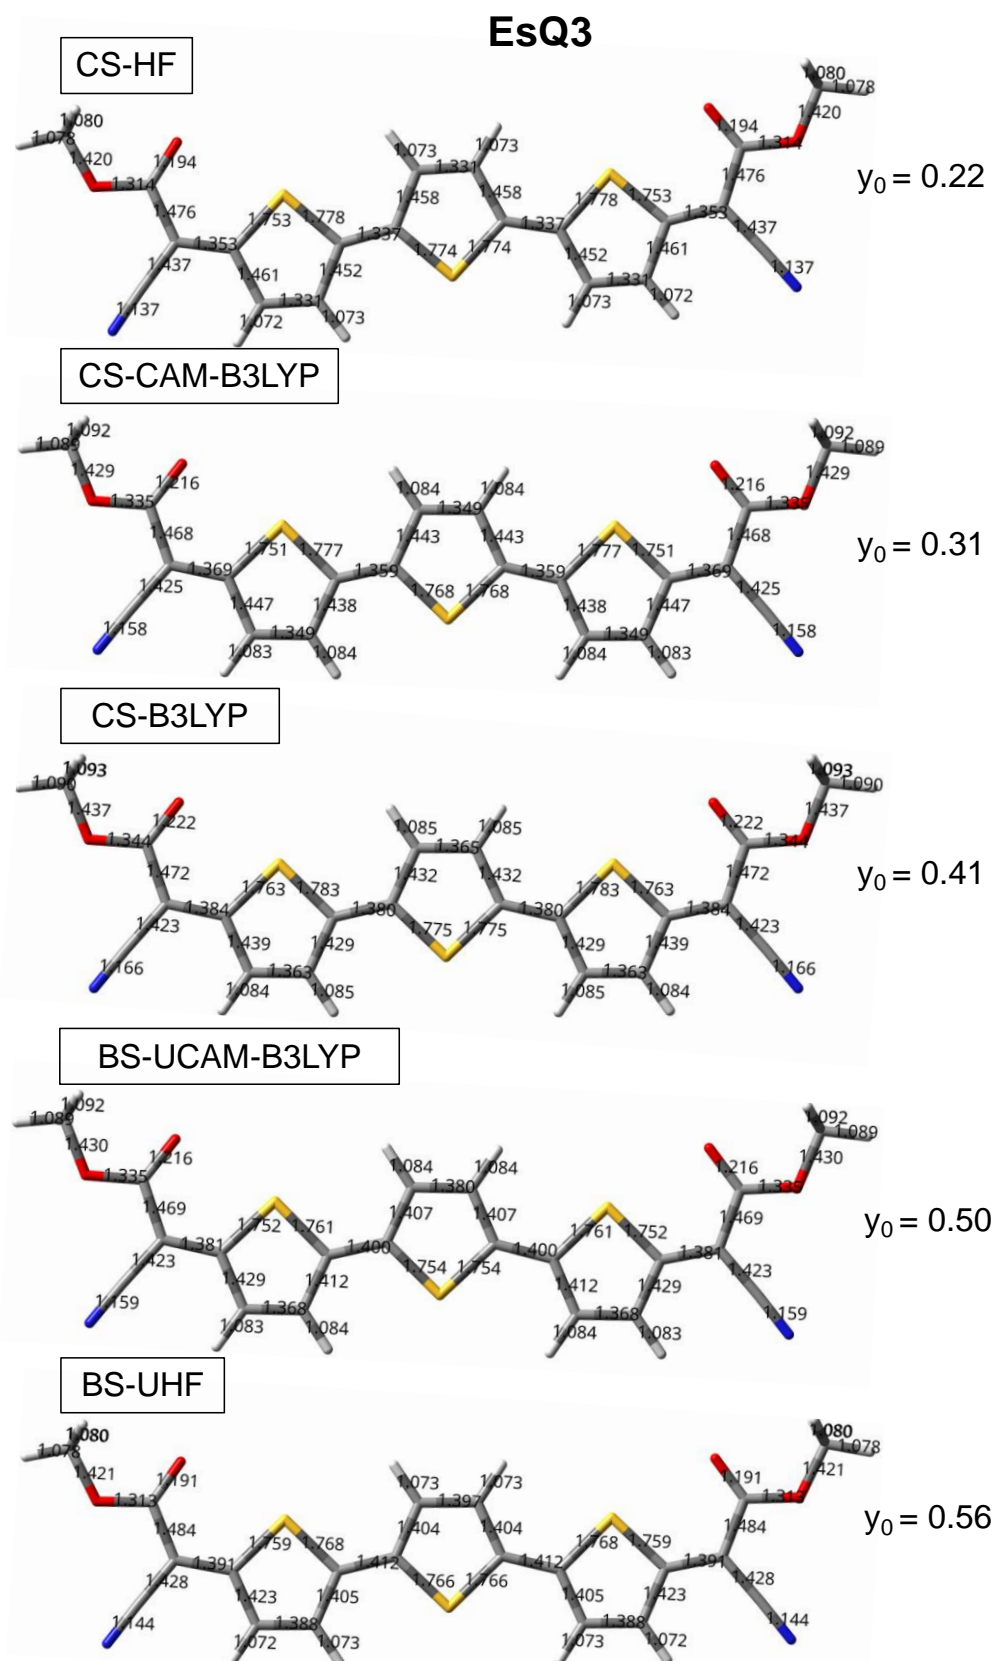

**Figure S3.** Library of ground state geometries generated for **EsQ3** and the corresponding  $y_0^{PUHF}$  value. The level of theory is indicated. The basis set is always 6-31G\*.

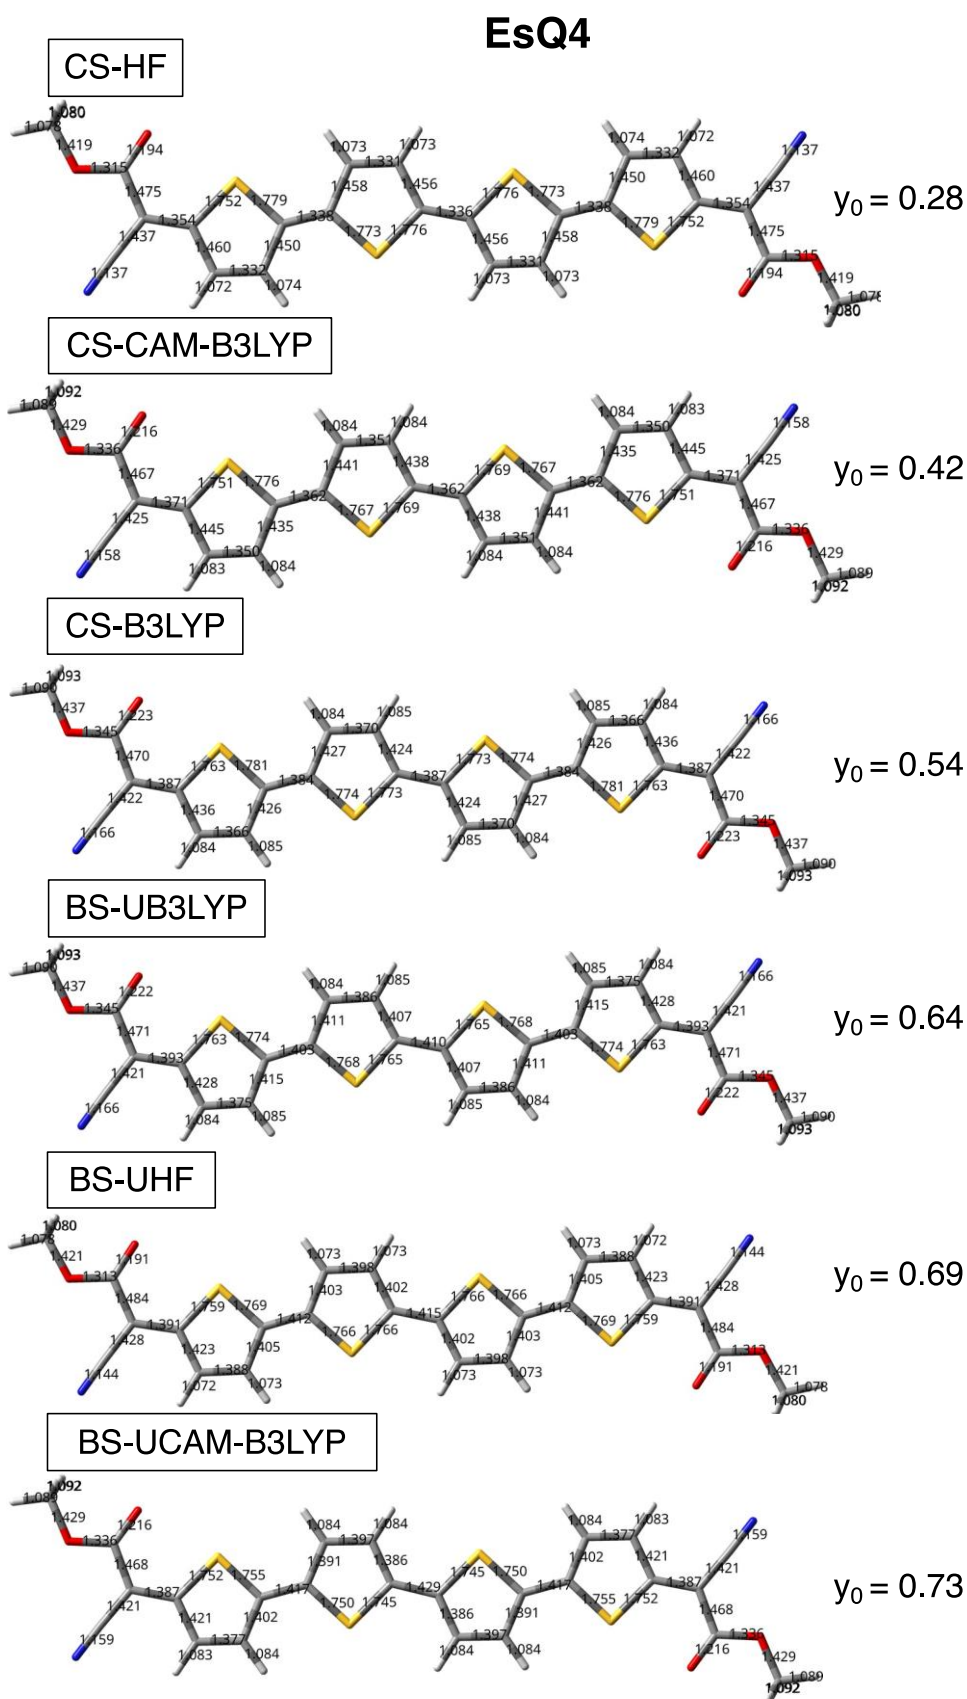

**Figure S4.** Library of ground state geometries generated for **EsQ4** and the corresponding  $y_0^{PUHF}$  value. The level of theory is indicated. The basis set is always 6-31G\*.

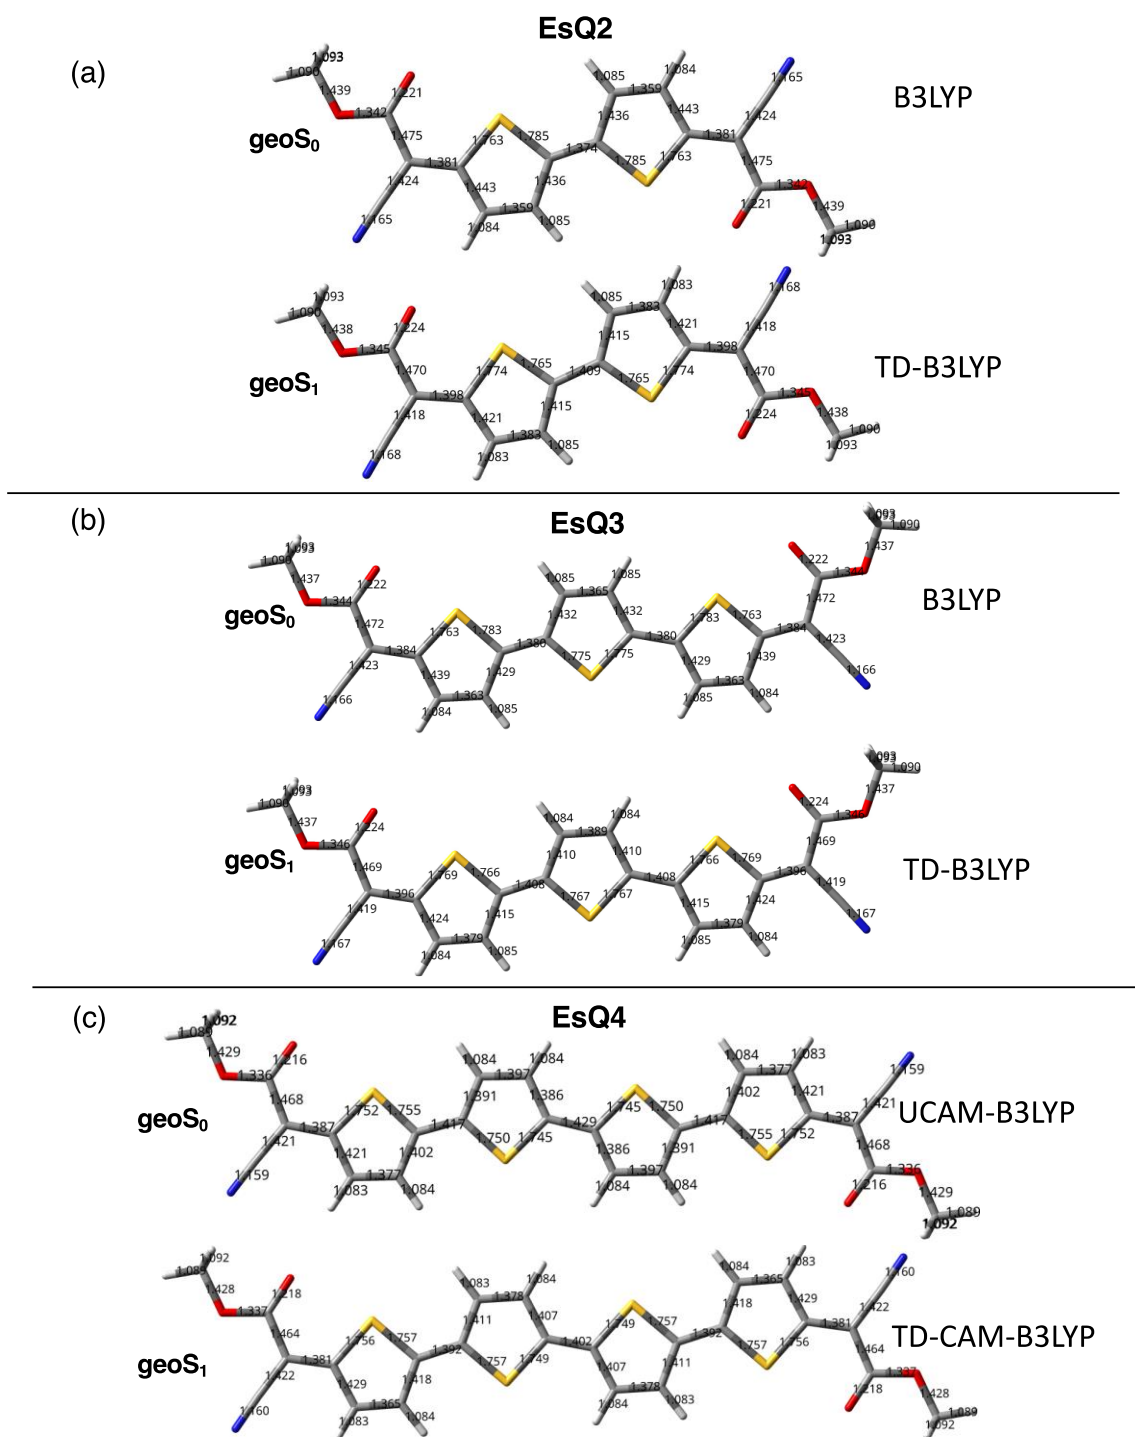

**Figure S5.** Comparison between ground state and excited state structure (optically active state dominated by the HOMO  $\rightarrow$  LUMO excitation) of **EsQ2-EsQ4** oligomers. The equilibrium structures were determined at CS-B3LYP / TD-B3LYP level for **EsQ2** and **EsQ3** and at BS-UCAM-B3LYP / TD-CAM-B3LYP level for **EsQ4**.

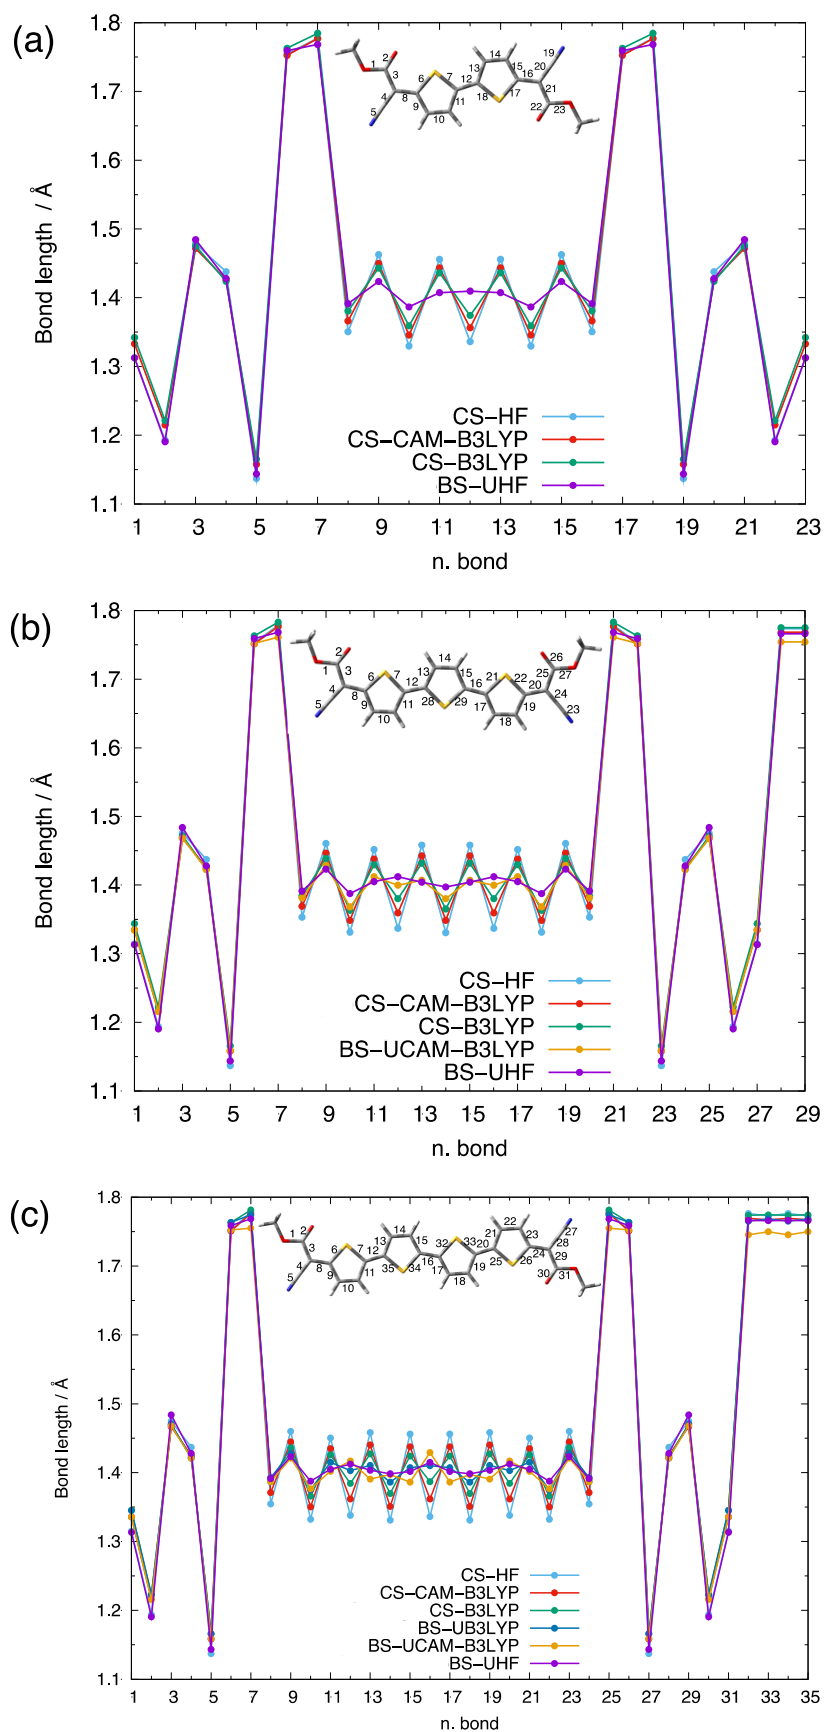

**Figure S6.** Bond lengths of (a) EsQ2, (b) EsQ3 and (c) EsQ4 calculated at respective optimized geometries. Top center of each panel: bond number definition.

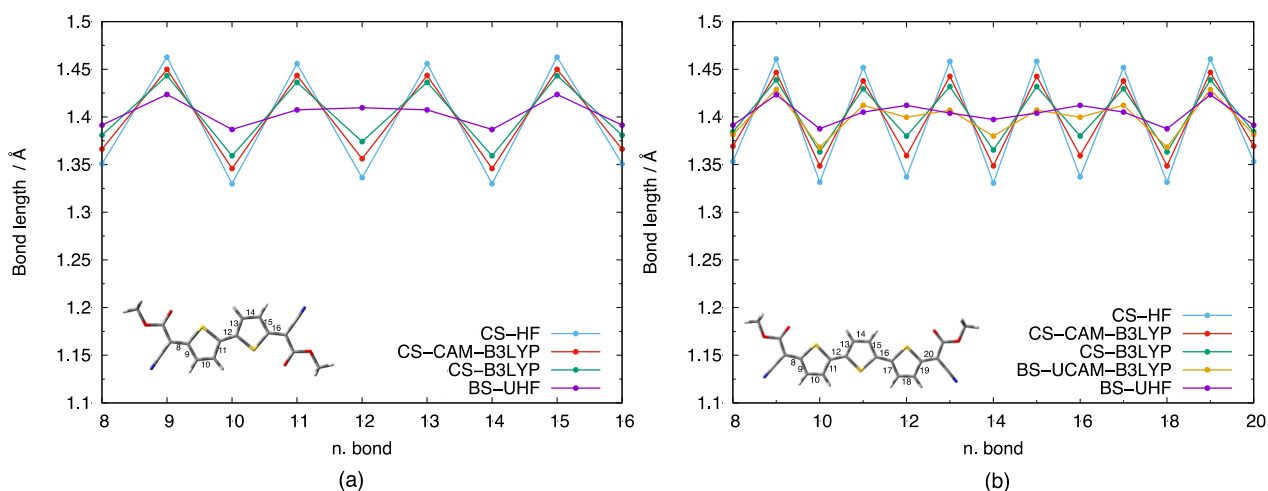

**Figure S7.** Bond lengths of (a) **EsQ2** and (b) **EsQ3** calculated at CS-HF (cyan), CS-CAM-B3LYP (red), CS-B3LYP (green), BS-UCAM-B3LYP (orange) and BS-UHF (purple) geometries. Bottom left of each panel: bond number definition.

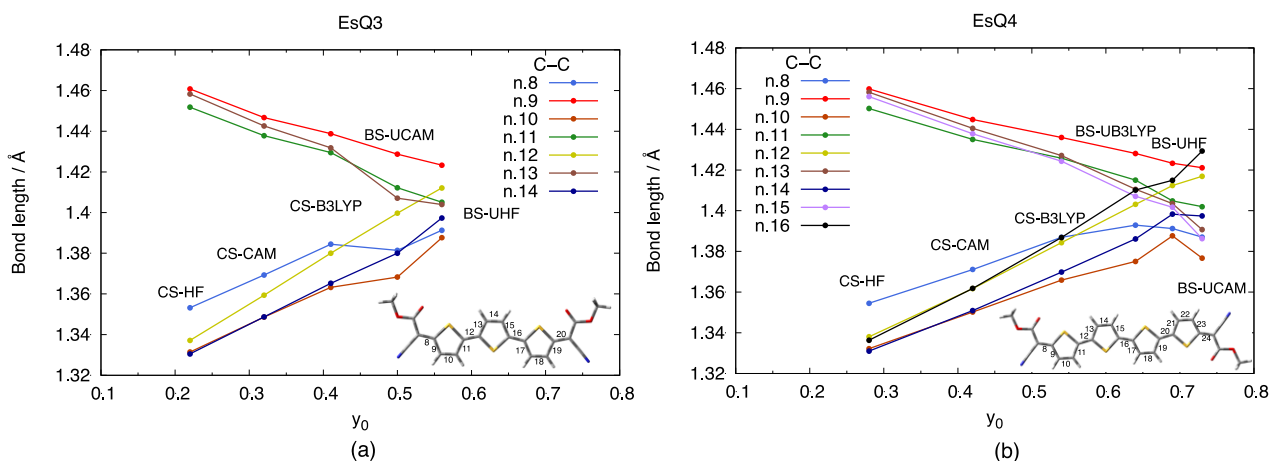

**Figure S8.** Correlation between C-C bond lengths and  $y_0^{PUHF}$  of (a) **EsQ3** and (b) **EsQ4** calculated at different geometries: CS-HF, CS-CAM-B3LYP, CS-B3LYP, BS-UB3LYP, BS-UCAM-B3LYP and BS-UHF. Bottom right: definition of bond number.

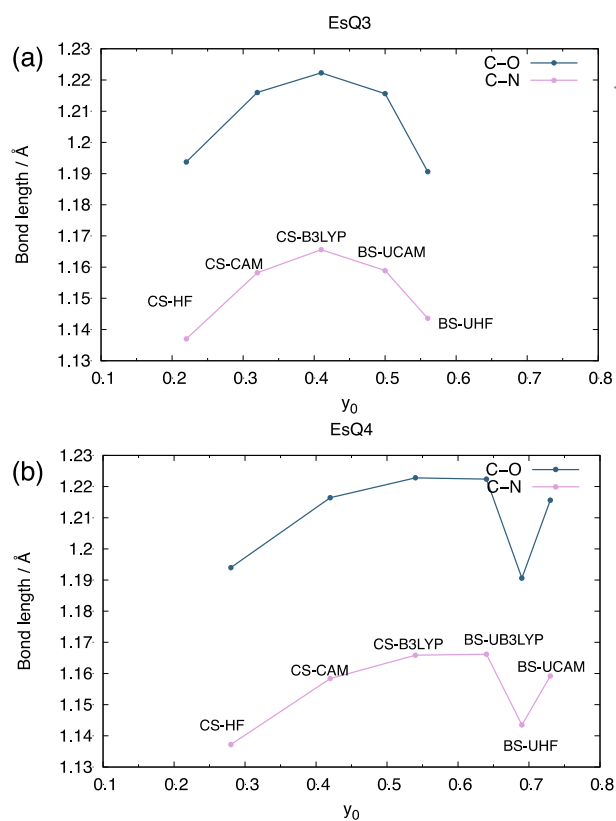

**Figure S9.** Correlation between C=O and C≡N bond lengths and  $y_0^{PUHF}$  of (a) **EsQ3** and (b) **EsQ4** calculated at available geometries. See Figure 3(a) for the definition of C=O bond.

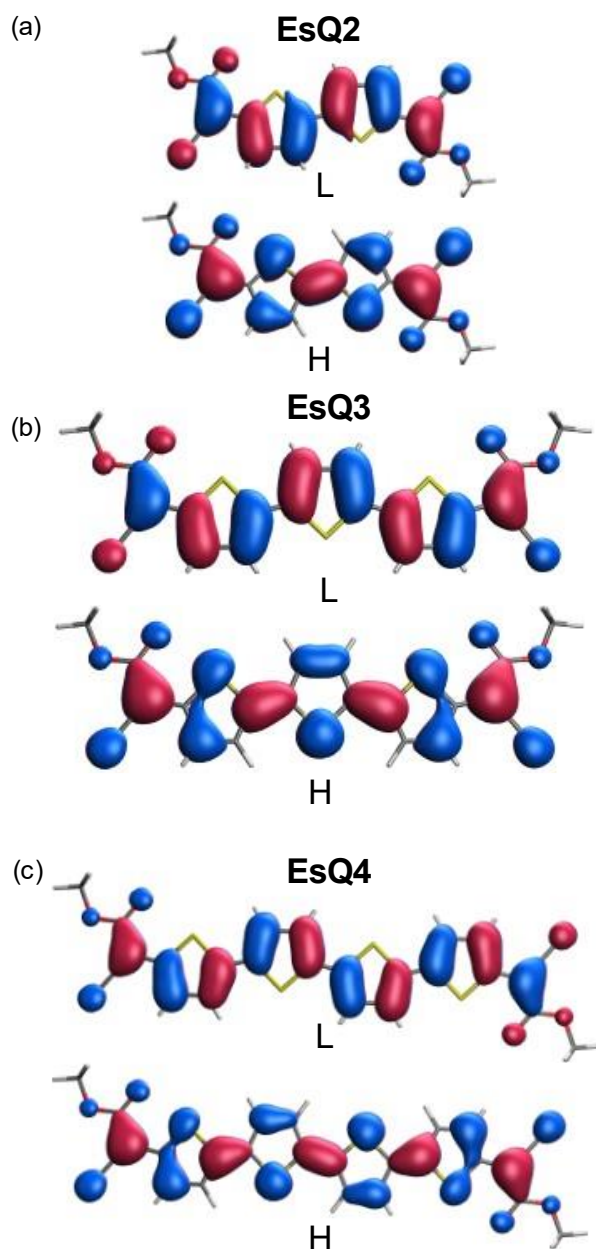

**Figure S10.** CS frontier orbitals of **EsQ2**, **EsQ3** and **EsQ4** from B3LYP/6-31G\* calculations.

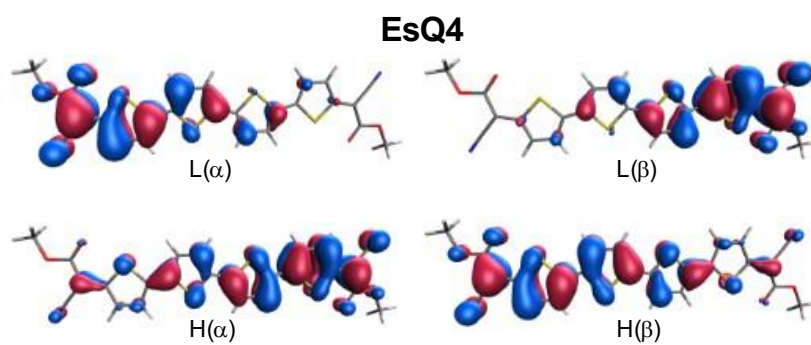

**Figure S11.** BS frontier orbitals of **EsQ4** from UCAM-B3LYP/6-31G\* calculations.

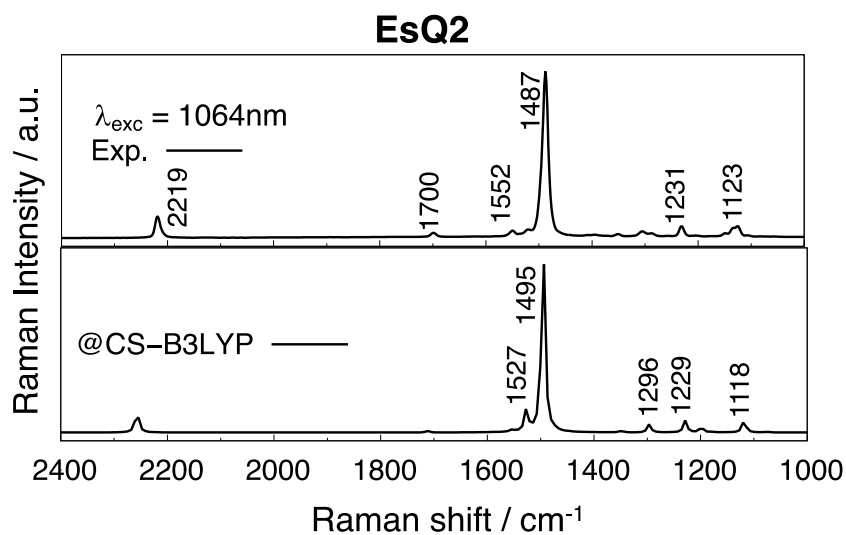

**Figure S12.** Comparison between experimental and calculated Raman spectra of EsQ2. The experimental spectrum is measured with excitation wavelength of 1064nm. The computed spectrum is obtained at the CS-B3LYP geometry of EsQ2.

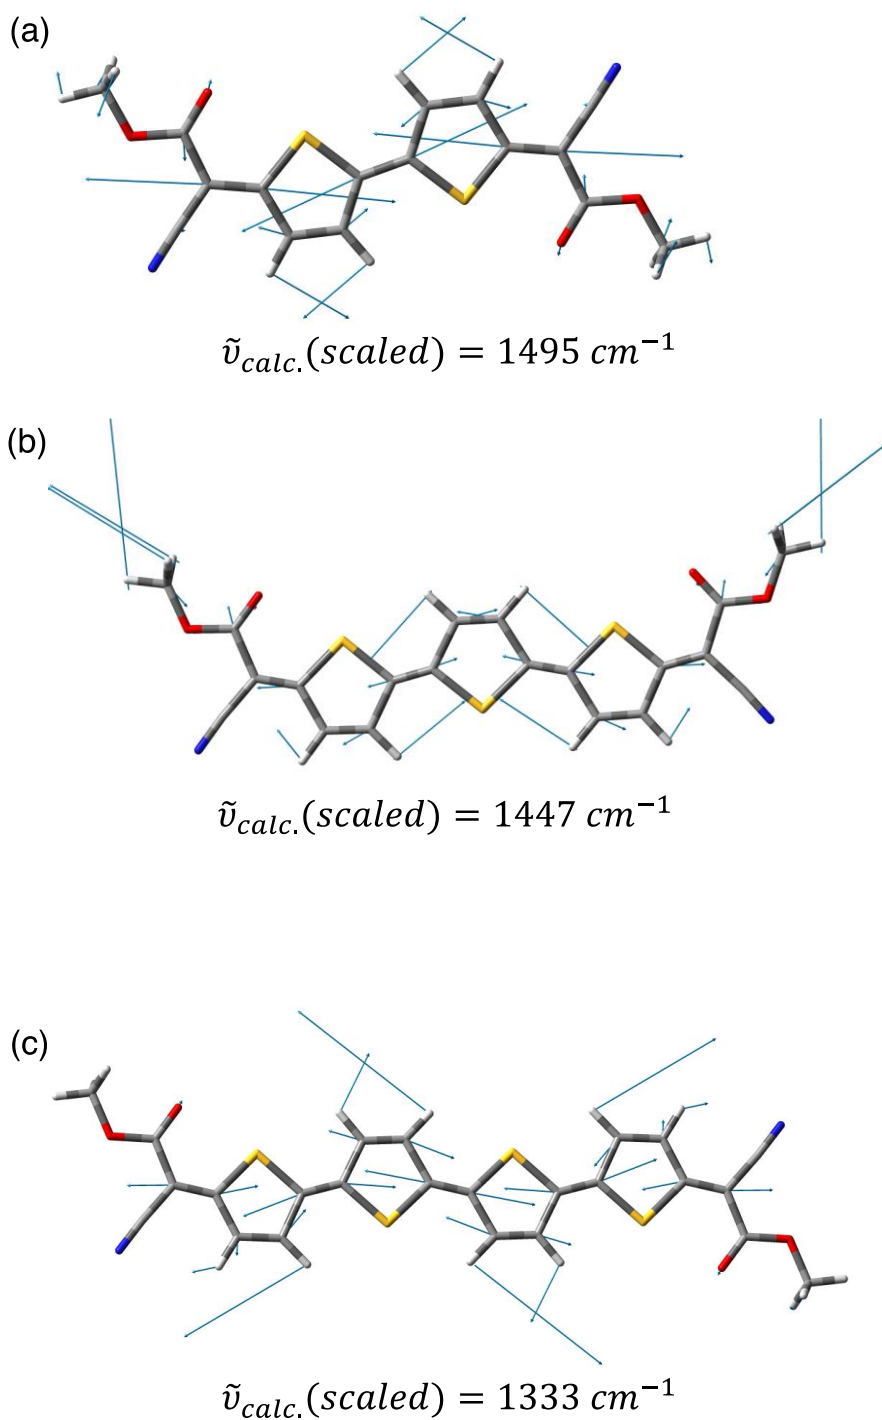

**Figure S13.** Vibrational modes dominated by the ECC coordinate and associated with the most intense bands of (a) **EsQ2** ( $\tilde{\nu}_{Exp} = 1487 \text{ cm}^{-1}$ ); (b) **EsQ3** ( $\tilde{\nu}_{Exp} = 1496 \text{ cm}^{-1}$ ); (c) **EsQ4** ( $\tilde{\nu}_{Exp} = 1356 \text{ cm}^{-1}$ ); The scaled wavenumbers (scale factor=0.97) calculated at CS-B3LYP geometry (for **EsQ2** and **EsQ3**) and BS-UB3LYP geometry (for **EsQ4**) are reported below each mode representation. Raman spectra calculated at B3LYP/6-31G\* level of theory.

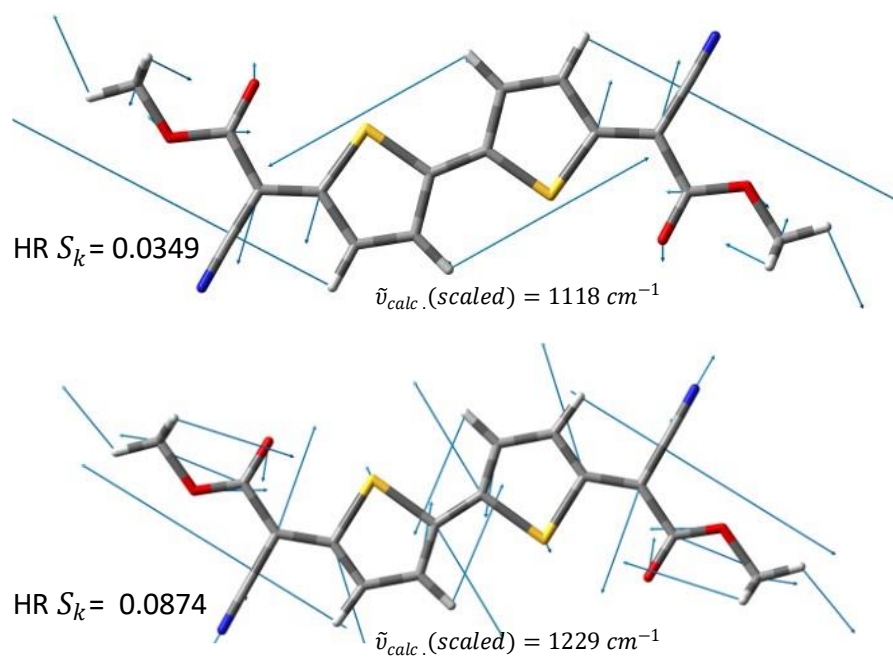

**Figure S14.** Vibrational modes below  $1300\text{ cm}^{-1}$  displaying large HR factors and therefore expected to display enhanced Raman activity in resonance with the optically active transition of **EsQ2**.

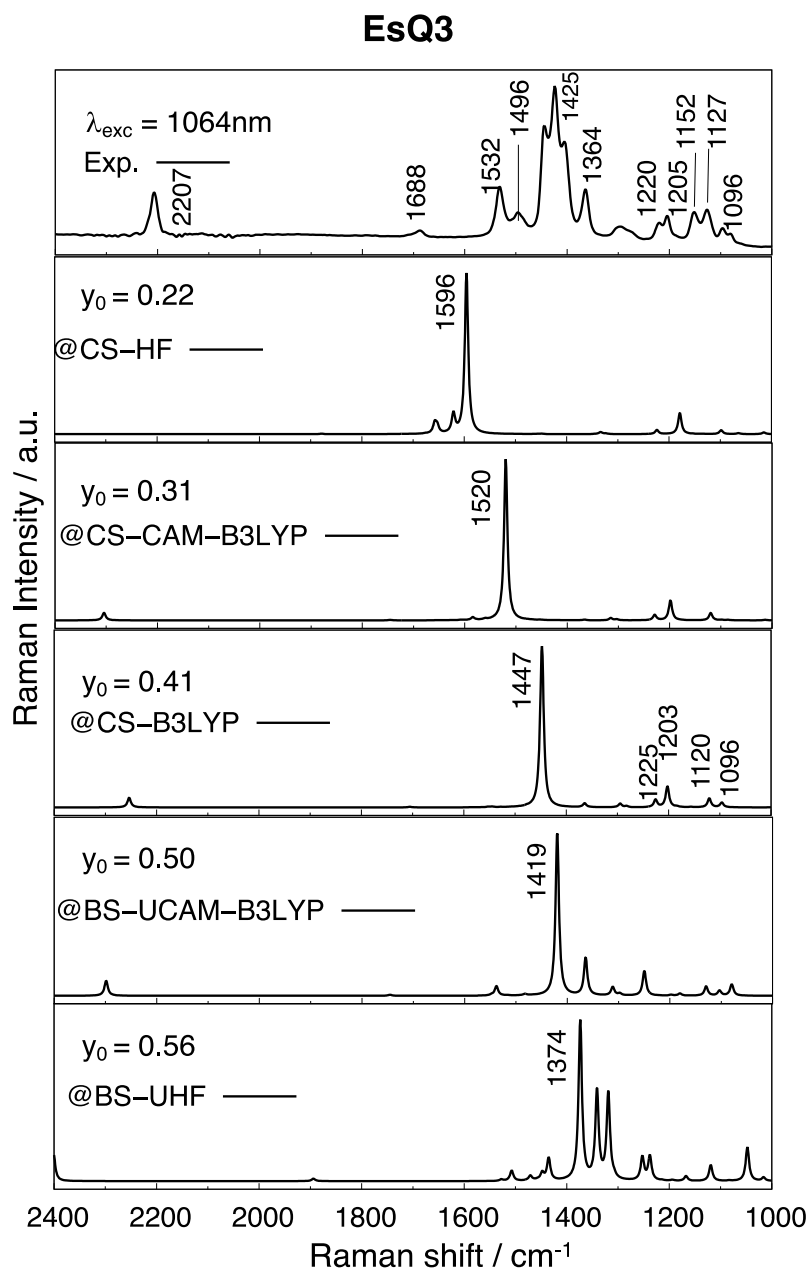

**Figure S15.** Comparison between experimental (top, spectrum measured at 1064 nm) and computed Raman spectra (B3LYP/6-31G\* level of theory) for the library of ground state geometries of **EsQ3** characterized by increasing diradical character as indicated in the top left part of each panel.

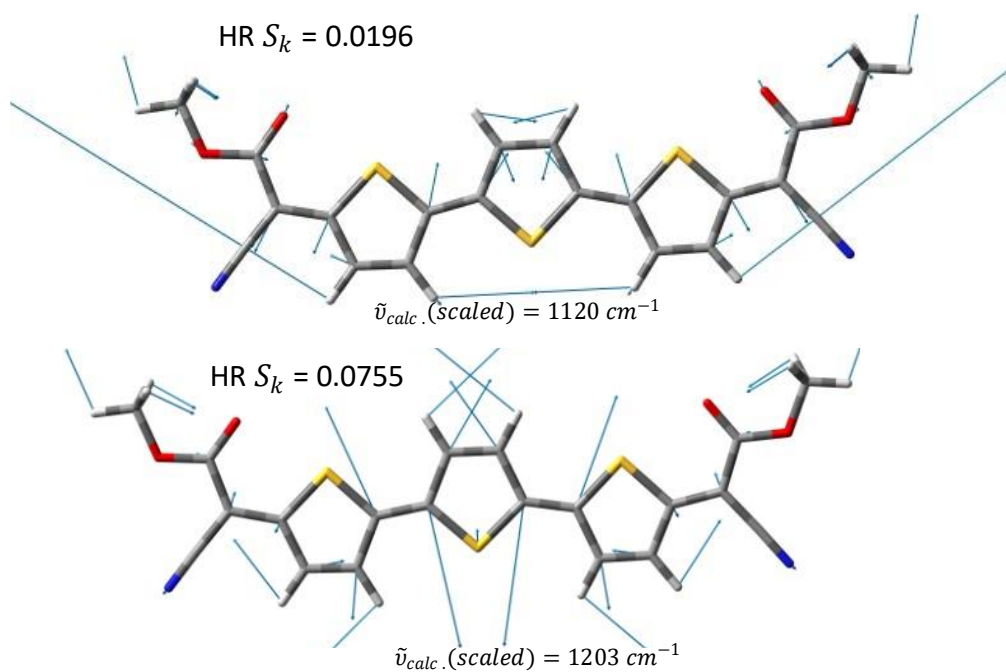

**Figure S16.** Vibrational modes below  $1300\text{ cm}^{-1}$  displaying large HR factors and therefore expected to display enhanced Raman activity in resonance with the optically active transition of **EsQ3**.

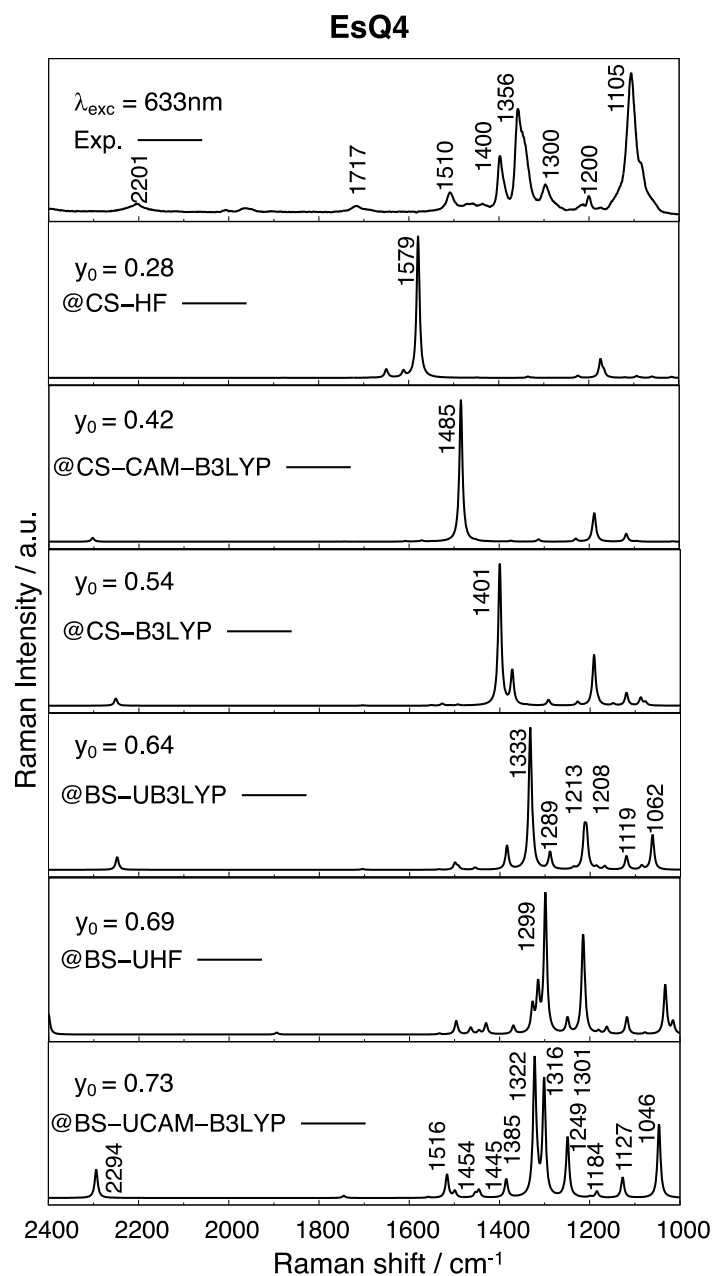

**Figure S17.** Comparison between experimental (top, spectrum measured at 633 nm) and computed Raman spectra (B3LYP/6-31G\* level of theory) for the library of ground state geometries of **EsQ4** characterized by increasing diradical character as indicated in the top left part of each panel.

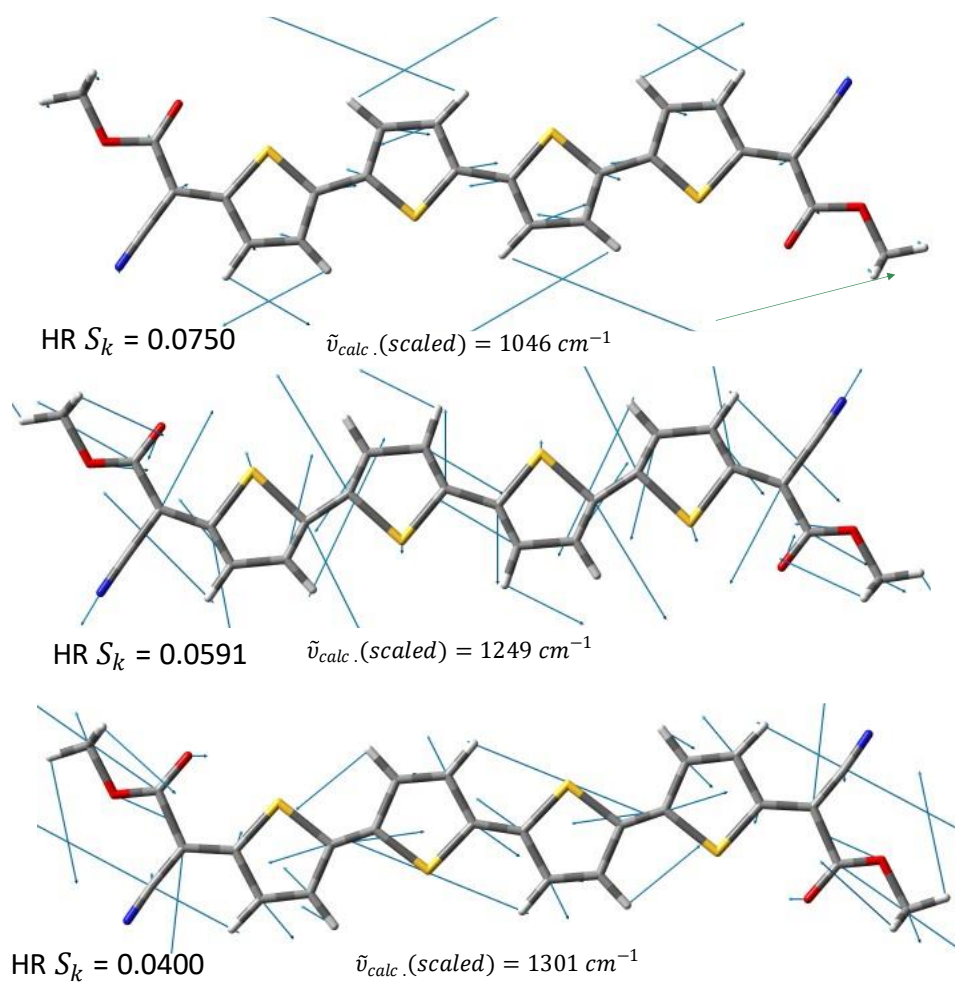

**Figure S18.** Vibrational modes below  $1300\text{ cm}^{-1}$  displaying the larger HR factors and therefore expected to display enhanced Raman activity in resonance with the optically active transition of **EsQ4**.

**Table S1.** Energy difference (in kcal/mol) between *Conf 1* and *Conf 2* of **EsQ2**, **EsQ3** and **EsQ4** calculated at different geometries.

| Energy difference between <i>Conf 1</i> and <i>Conf 2</i> <sup>1</sup> (kcal/mol) |           |                  |              |               |                   |            |
|-----------------------------------------------------------------------------------|-----------|------------------|--------------|---------------|-------------------|------------|
| Geometry →<br>Molecule ↓                                                          | CS-<br>HF | CS-<br>CAM-B3LYP | CS-<br>B3LYP | BS-<br>UB3LYP | BS-<br>UCAM-B3LYP | BS-<br>UHF |
| <b>EsQ2</b>                                                                       | 7.65      | 7.61             | 7.57         | /             | /                 | 7.28       |
| <b>EsQ3</b>                                                                       | 7.90      | 7.85             | 7.82         | /             | 8.20              | 7.45       |
| <b>EsQ4</b>                                                                       | 7.89      | 7.84             | 7.79         | 8.09          | 8.19              | 7.38       |

<sup>1</sup> The energy difference is calculated as E(*Conf 1*) – E(*Conf 2*)

**Table S2.** N<sup>FOD</sup> values of **EsQ2**, **EsQ3** and **EsQ4** at available optimized geometries.

| N <sup>FOD</sup>         |           |              |          |           |               |            |
|--------------------------|-----------|--------------|----------|-----------|---------------|------------|
| Geometry →<br>Molecule ↓ | CS-<br>HF | CS-CAM-B3LYP | CS-B3LYP | BS-UB3LYP | BS-UCAM-B3LYP | BS-<br>UHF |
| <b>EsQ2</b>              | 0.62      | 0.72         | 0.80     | /         | /             | 0.93       |
| <b>EsQ3</b>              | 0.89      | 1.03         | 1.15     | /         | 1.25          | 1.31       |
| <b>EsQ4</b>              | 1.15      | 1.34         | 1.49     | 1.61      | 1.69          | 1.66       |

**Table S3.** Stabilization energies (kcal/mol) of BS optimized geometries compared to the corresponding CS optimized geometries with the same functional.

| Total stabilization energy (CS-BS) |                            |                                      |
|------------------------------------|----------------------------|--------------------------------------|
| Molecule                           | B3LYP/UB3LYP<br>(kcal/mol) | CAM-B3LYP / UCAM-B3LYP<br>(kcal/mol) |
| <b>EsQ2</b>                        | /                          | /                                    |
| <b>EsQ3</b>                        | /                          | 2.08                                 |
| <b>EsQ4</b>                        | 1.00                       | 7.26                                 |
